# Supplementary material for: Photocatalytic Activity in the In-Flow Degradation of NO on Porous TiO2–Coated Glasses from Hybrid Inorganic–Organic Thin Films Prepared by a Combined ALD/MLD Deposition Strategy
Source: MDPI journal article supplement (doi:10.3390/coatings12040488), 2022-04-05
Supplement: s1 [file s1]

Archive with 1 entries (1 files):
- coatings-1641519-Supplementary.pdf
