# Supplementary material for: Photocatalytic Activity in the In-Flow Degradation of NO on Porous TiO2–Coated Glasses from Hybrid Inorganic–Organic Thin Films Prepared by a Combined ALD/MLD Deposition Strategy
Source: MDPI journal article supplement (doi:10.3390/coatings12040488), 2022-04-05
Supplement: s1 [file s1 › coatings-1641519-Supplementary.pdf]

# Supplementary Materials: Photocatalytic Activity in the In-Flow Degradation of NO on Porous TiO<sub>2</sub>-Coated Glasses from Hybrid Inorganic–Organic Thin Films Prepared by a Combined ALD/MLD Deposition Strategy

Ramón Azpiroz <sup>1</sup>, Marina Borraz <sup>2</sup>, Aida González <sup>1,3</sup>, Catalina Mansilla <sup>2,\*</sup>, Manuel Iglesias, <sup>1,\*</sup>  
and Jesús J. Pérez-Torrente <sup>1,\*</sup>

<sup>1</sup> Departamento de Química Inorgánica, Instituto de Síntesis Química y Catálisis Homogénea-ISQCH, Universidad de Zaragoza-C.S.I.C., 50009 Zaragoza, Spain; rayazp2@gmail.com (R.A.); a.gonzalez@duglass.es (A.G.)

<sup>2</sup> Ctechnano, Av. de Tolosa 76, 20018 Donostia – San Sebastian, Spain; m.borraz@ctechnano.com

<sup>3</sup> Ariño Duglass, Pol. Ind. Royales Bajos s/n, Puebla de Alfindén (la), 50171 Zaragoza, Spain

\* Correspondence: c.mansilla@ctechnano.com (C.M.); miglesia@unizar.es (M.I.); perez@unizar.es (J.J.P.-T.)

## Table of contents

### 1. ALD/MLD thin film deposition on glass. Deposition and annealing conditions.

1.1. TiCl<sub>4</sub>-ethylene glycol (EG) precursors: S2

1.2. TiCl<sub>4</sub>-water precursors: S4

1.3. TiCl<sub>4</sub>-hydroquinone (HQ) precursors: S4

### 2. Online monitoring of the photocatalytic degradation of NO(g): S7

### 3. Experimental setup for the measurement of the photocatalytic activity: S13

### 4. Raman, XRD and UV-Vis spectra for selected photocatalytic coatings: S13

### 5. SEM/TEM images for selected photocatalytic coatings: S15

**Citation:** Azpiroz, R.; Borraz, M.; González, A.; Mansilla, C.; Iglesias, M.; Pérez-Torrente, J.J.

Photocatalytic Activity in the In-Flow Degradation of NO on Porous TiO<sub>2</sub>-Coated Glasses from Hybrid Inorganic–Organic Thin Films Prepared by a Combined ALD/MLD Deposition Strategy. *Coatings* **2022**, *12*, 488. <https://doi.org/10.3390/coatings12040488>

Academic Editor: Joaquim Carneiro

Received: 1 March 2022

Accepted: 1 April 2022

Published: 5 April 2022

**Publisher's Note:** MDPI stays neutral with regard to jurisdictional claims in published maps and institutional affiliations.

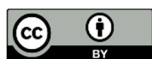

**Copyright:** © 2022 by the authors. Submitted for possible open access publication under the terms and conditions of the Creative Commons Attribution (CC BY) license (<https://creativecommons.org/licenses/by/4.0/>).

# 1. ALD/MLD thin film deposition on glass. Deposition and annealing conditions.

## 1.1. $\text{TiCl}_4$ -ethylene glycol (EG) precursors.

**Table S1.**  $\text{TiCl}_4$ -EG. Standard deposition conditions. Annealing conditions: 2 h at 400 °C.

| Precursors          |                |               |           |                 |               |           |                  |        |
|---------------------|----------------|---------------|-----------|-----------------|---------------|-----------|------------------|--------|
| $\text{TiCl}_4$     |                |               |           | Ethylene glycol |               |           |                  | Cycles |
| $\text{N}_2$ (sccm) | Pulse (ms)     | Residence (s) | Purge (s) | Pulse (ms)      | Residence (s) | Purge (s) | Temperature (°C) |        |
| 40                  | 300            | 15            | 80        | 1000            | 15            | 90        | 70               | 200    |
| Temperature (°C)    |                |               |           |                 |               |           |                  |        |
| Inlet               | Bottom Chamber |               |           | Lid Chamber     |               |           | Outlet           |        |
| 110                 | 110            |               |           | 110             |               |           | 120              |        |

**Table S2.**  $\text{TiCl}_4$ -EG. Standard deposition conditions. Annealing conditions: RT to 250 °C (1 min), 250 °C to 450 °C (90 min), 3 h at 450 °C.

| Precursors          |                |               |           |                 |               |           |                  |        |
|---------------------|----------------|---------------|-----------|-----------------|---------------|-----------|------------------|--------|
| $\text{TiCl}_4$     |                |               |           | Ethylene glycol |               |           |                  | Cycles |
| $\text{N}_2$ (sccm) | Pulse (ms)     | Residence (s) | Purge (s) | Pulse (ms)      | Residence (s) | Purge (s) | Temperature (°C) |        |
| 40                  | 300            | 15            | 80        | 1000            | 15            | 90        | 70               | 200    |
| Temperature (°C)    |                |               |           |                 |               |           |                  |        |
| Inlet               | Bottom Chamber |               |           | Lid Chamber     |               |           | Outlet           |        |
| 110                 | 110            |               |           | 110             |               |           | 120              |        |

**Table S3.**  $\text{TiCl}_4$ -EG. Deposition conditions: 80 °C. Annealing conditions: RT to 250 °C (1 min), 250 °C to 450 °C (90 min), 3 h at 450 °C.

| Precursors          |                |               |           |                 |               |           |                  |        |
|---------------------|----------------|---------------|-----------|-----------------|---------------|-----------|------------------|--------|
| $\text{TiCl}_4$     |                |               |           | Ethylene glycol |               |           |                  | Cycles |
| $\text{N}_2$ (sccm) | Pulse (ms)     | Residence (s) | Purge (s) | Pulse (ms)      | Residence (s) | Purge (s) | Temperature (°C) |        |
| 40                  | 300            | 15            | 80        | 1000            | 15            | 90        | 80               | 200    |
| Temperature (°C)    |                |               |           |                 |               |           |                  |        |
| Inlet               | Bottom Chamber |               |           | Lid Chamber     |               |           | Outlet           |        |
| 110                 | 110            |               |           | 110             |               |           | 120              |        |

**Table S4.**  $\text{TiCl}_4$ -EG. Deposition conditions: EG Pulse 1500ms. Annealing conditions: RT to 250 °C (1 min), 250 °C to 450 °C (90 min), 3 h at 450 °C.

| Precursors          |                |               |           |                 |               |           |                  |        |
|---------------------|----------------|---------------|-----------|-----------------|---------------|-----------|------------------|--------|
| $\text{TiCl}_4$     |                |               |           | Ethylene glycol |               |           |                  | Cycles |
| $\text{N}_2$ (sccm) | Pulse (ms)     | Residence (s) | Purge (s) | Pulse (ms)      | Residence (s) | Purge (s) | Temperature (°C) |        |
| 40                  | 300            | 15            | 80        | 1500            | 15            | 90        | 80               | 200    |
| Temperature (°C)    |                |               |           |                 |               |           |                  |        |
| Inlet               | Bottom Chamber |               |           | Lid Chamber     |               |           | Outlet           |        |
| 110                 | 110            |               |           | 110             |               |           | 120              |        |

**Table S5.** TiCl<sub>4</sub>-EG. Deposition conditions: EG Pulse 1500ms. Annealing conditions: RT to 250 °C (1 min), 250 °C to 550 °C (90 min), 3 h at 550 °C.

| Precursors            |                |               |           |                 |               |           |                  |        |
|-----------------------|----------------|---------------|-----------|-----------------|---------------|-----------|------------------|--------|
| TiCl <sub>4</sub>     |                |               |           | Ethylene glycol |               |           |                  |        |
| N <sub>2</sub> (sccm) | Pulse (ms)     | Residence (s) | Purge (s) | Pulse (ms)      | Residence (s) | Purge (s) | Temperature (°C) | Cycles |
| 40                    | 300            | 15            | 80        | 1500            | 15            | 90        | 80               | 200    |
| Temperature (°C)      |                |               |           |                 |               |           |                  |        |
| Inlet                 | Bottom Chamber |               |           |                 | Lid Chamber   |           | Outlet           |        |
| 110                   | 110            |               |           |                 | 110           |           | 120              |        |

**Table S6.** TiCl<sub>4</sub>-EG. Deposition conditions: EG Pulse 1500ms. Annealing conditions: RT to 250 °C (1 min), 250 °C to 450 °C (90 min), 5 h at 450 °C.

| Precursors            |                |               |           |                 |               |           |                  |        |
|-----------------------|----------------|---------------|-----------|-----------------|---------------|-----------|------------------|--------|
| TiCl <sub>4</sub>     |                |               |           | Ethylene glycol |               |           |                  |        |
| N <sub>2</sub> (sccm) | Pulse (ms)     | Residence (s) | Purge (s) | Pulse (ms)      | Residence (s) | Purge (s) | Temperature (°C) | Cycles |
| 40                    | 300            | 15            | 80        | 1500            | 15            | 90        | 80               | 200    |
| Temperature (°C)      |                |               |           |                 |               |           |                  |        |
| Inlet                 | Bottom Chamber |               |           |                 | Lid Chamber   |           | Outlet           |        |
| 110                   | 110            |               |           |                 | 110           |           | 120              |        |

**Table S7.** TiCl<sub>4</sub>-EG. Deposition conditions: EG Pulse 4000ms. Cycles: 260. Annealing conditions: RT to 250 °C (1 min), 250 °C to 450 °C (90 min), 3 h at 450 °C.

| Precursors            |                |               |           |                 |               |           |                  |        |
|-----------------------|----------------|---------------|-----------|-----------------|---------------|-----------|------------------|--------|
| TiCl <sub>4</sub>     |                |               |           | Ethylene glycol |               |           |                  |        |
| N <sub>2</sub> (sccm) | Pulse (ms)     | Residence (s) | Purge (s) | Pulse (ms)      | Residence (s) | Purge (s) | Temperature (°C) | Cycles |
| 40                    | 300            | 15            | 80        | 4000            | 15            | 90        | 80               | 260    |
| Temperature (°C)      |                |               |           |                 |               |           |                  |        |
| Inlet                 | Bottom Chamber |               |           |                 | Lid Chamber   |           | Outlet           |        |
| 110                   | 110            |               |           |                 | 110           |           | 120              |        |

**Table S8.** TiCl<sub>4</sub>-EG/EG. Deposition conditions: EG Pulse 4000 ms. Annealing conditions: RT to 250 °C (1 min), 250 °C to 450 °C (90 min), 3 h at 450 °C.

| Precursors            |                |               |           |                 |               |           |                  |                 |               |           |                  |        |
|-----------------------|----------------|---------------|-----------|-----------------|---------------|-----------|------------------|-----------------|---------------|-----------|------------------|--------|
| TiCl <sub>4</sub>     |                |               |           | Ethylene glycol |               |           |                  | Ethylene glycol |               |           |                  |        |
| N <sub>2</sub> (sccm) | Pulse (ms)     | Residence (s) | Purge (s) | Pulse (ms)      | Residence (s) | Purge (s) | Temperature (°C) | Pulse (ms)      | Residence (s) | Purge (s) | Temperature (°C) | Cycles |
| 40                    | 300            | 15            | 80        | 4000            | 20            | 90        | 80               | 4000            | 20            | 90        | 80               | 200    |
| Temperature (°C)      |                |               |           |                 |               |           |                  |                 |               |           |                  |        |
| Inlet                 | Bottom Chamber |               |           |                 | Lid Chamber   |           |                  |                 | Outlet        |           |                  |        |
| 110                   | 110            |               |           |                 | 110           |           |                  |                 | 120           |           |                  |        |

1.2.  $\text{TiCl}_4\text{-H}_2\text{O}$  precursors.**Table S9.**  $\text{TiCl}_4/\text{H}_2\text{O}$ . Deposition temperature: 180 °C. Annealing conditions: 3 h at 400 °C.

| Precursors            |                   |               |           |                  |               |           |        |
|-----------------------|-------------------|---------------|-----------|------------------|---------------|-----------|--------|
| N <sub>2</sub> (sccm) | TiCl <sub>4</sub> |               |           | H <sub>2</sub> O |               |           | Cycles |
|                       | Pulse (ms)        | Residence (s) | Purge (s) | Pulse (ms)       | Residence (s) | Purge (s) |        |
|                       | 100               | 200           | 0         | 40               | 200           | 0         |        |
| Temperature (°C)      |                   |               |           |                  |               |           |        |
| Inlet                 | Bottom Chamber    |               |           | Lid Chamber      |               |           | Outlet |
| 120                   | 180               |               |           | 180              |               |           | 120    |

1.3.  $\text{TiCl}_4\text{-hydroquinone (HQ)}$  precursors.**Table S10.**  $\text{TiCl}_4/\text{H}_2\text{O}$  (20 cycles)- $\text{TiCl}_4/\text{HQ}$  (500 cycles). Deposition temperature: 210 °C. Annealing conditions: RT to 250 °C (1 min), 250 °C to 450 °C (90 min), 3 h at 450 °C.

| Layer 1: $\text{TiO}_2$ |                 |               |            |                      |               |                  |        |
|-------------------------|-----------------|---------------|------------|----------------------|---------------|------------------|--------|
| $\text{N}_2$ (sccm)     | $\text{TiCl}_4$ |               |            | $\text{H}_2\text{O}$ |               |                  | Cycles |
|                         | Pulse (ms)      | Residence (s) | Purge (s)  | Pulse (ms)           | Residence (s) | Purge (s)        |        |
| 40                      | 300             | 15            | 80         | 4000                 | 20            | 90               | 20     |
| Layer 2: Ti-HQ          |                 |               |            |                      |               |                  |        |
| Pulse (ms)              | $\text{TiCl}_4$ |               |            | Hydroquinone         |               |                  | Cycles |
|                         | Residence (s)   | Purge (s)     | Pulse (ms) | Residence (s)        | Purge (s)     | Temperature (°C) |        |
| 200                     | 0               | 60            | 12         | 0                    | 80            | 120              | 500    |
| Temperature (°C)        |                 |               |            |                      |               |                  |        |
| Inlet                   | Bottom Chamber  |               |            | Lid Chamber          |               |                  | Outlet |
| 120                     | 210             |               |            | 210                  |               |                  | 120    |

**Table S11.**  $\text{TiCl}_4/\text{H}_2\text{O}$  (2 cycles)- $\text{TiCl}_4/\text{HQ}$  (4 cycles). Global cycles 120. Deposition temperature: 210 °C. Annealing conditions: RT to 250 °C (1 min), 250 °C to 450 °C (90 min), 3 h at 450 °C.

| Layer 1: $\text{TiO}_2$ |                 |               |            |                      |               |                  |               |
|-------------------------|-----------------|---------------|------------|----------------------|---------------|------------------|---------------|
| $\text{N}_2$ (sccm)     | $\text{TiCl}_4$ |               |            | $\text{H}_2\text{O}$ |               |                  | Cycles        |
|                         | Pulse (ms)      | Residence (s) | Purge (s)  | Pulse (ms)           | Residence (s) | Purge (s)        |               |
| 65                      | 200             | 0             | 60         | 200                  | 0             | 65               | 2             |
| Layer 2: Ti-HQ          |                 |               |            |                      |               |                  |               |
| Pulse (ms)              | $\text{TiCl}_4$ |               |            | Hydroquinone         |               |                  | Cycles Global |
|                         | Residence (s)   | Purge (s)     | Pulse (ms) | Residence (s)        | Purge (s)     | Temperature (°C) |               |
| 200                     | 0               | 60            | 12         | 0                    | 70            | 120              | 120           |
| Temperature (°C)        |                 |               |            |                      |               |                  |               |
| Inlet                   | Bottom Chamber  |               |            | Lid Chamber          |               |                  | Outlet        |

|     |     |     |     |
|-----|-----|-----|-----|
| 120 | 210 | 210 | 120 |
|-----|-----|-----|-----|

**Table S12.** TiCl<sub>4</sub>/H<sub>2</sub>O (2 cycles)-TiCl<sub>4</sub>/HQ (8 cycles). Global cycles 120. Deposition temperature: 210 °C. Annealing conditions: RT to 250 °C (1 min), 250 °C to 450 °C (90 min), 3 h at 450 °C.

| Layer 1: TiO <sub>2</sub> |                |               |              |                  |               |                  |             |                  |
|---------------------------|----------------|---------------|--------------|------------------|---------------|------------------|-------------|------------------|
| TiCl <sub>4</sub>         |                |               |              | H <sub>2</sub> O |               |                  |             |                  |
| N <sub>2</sub> (sccm)     | Pulse (ms)     | Residence (s) | Purge (s)    | Pulse (ms)       | Residence (s) | Purge (s)        | Cycles      |                  |
| 65                        | 200            | 0             | 60           | 200              | 0             | 65               | 2           |                  |
| Layer 2: Ti-HQ            |                |               |              |                  |               |                  |             |                  |
| TiCl <sub>4</sub>         |                |               | Hydroquinone |                  |               |                  |             |                  |
| Pulse (ms)                | Residence (s)  | Purge (s)     | Pulse (ms)   | Residence (s)    | Purge (s)     | Temperature (°C) | Cy-<br>cles | Cycles<br>Global |
| 200                       | 0              | 60            | 12           | 0                | 70            | 120              | 8           | 120              |
| Temperature (°C)          |                |               |              |                  |               |                  |             |                  |
| Inlet                     | Bottom Chamber |               |              |                  | Lid Chamber   |                  | Outlet      |                  |
| 120                       | 210            |               |              |                  | 210           |                  | 120         |                  |

**Table S13.** TiCl<sub>4</sub>/H<sub>2</sub>O (4 cycles)-TiCl<sub>4</sub>/HQ (2 cycles). Global cycles 120. Deposition temperature: 210 °C. Annealing conditions: RT to 250 °C (1 min), 250 °C to 450 °C (90 min), 3 h at 450 °C.

| Layer 1: TiO <sub>2</sub> |                |               |              |                  |               |                  |             |                  |
|---------------------------|----------------|---------------|--------------|------------------|---------------|------------------|-------------|------------------|
| TiCl <sub>4</sub>         |                |               |              | H <sub>2</sub> O |               |                  |             |                  |
| N <sub>2</sub> (sccm)     | Pulse (ms)     | Residence (s) | Purge (s)    | Pulse (ms)       | Residence (s) | Purge (s)        | Cycles      |                  |
| 65                        | 200            | 0             | 60           | 200              | 0             | 65               | 4           |                  |
| Layer 2: Ti-HQ            |                |               |              |                  |               |                  |             |                  |
| TiCl <sub>4</sub>         |                |               | Hydroquinone |                  |               |                  |             |                  |
| Pulse (ms)                | Residence (s)  | Purge (s)     | Pulse (ms)   | Residence (s)    | Purge (s)     | Temperature (°C) | Cy-<br>cles | Cycles<br>Global |
| 200                       | 0              | 60            | 12           | 0                | 70            | 120              | 2           | 120              |
| Temperature (°C)          |                |               |              |                  |               |                  |             |                  |
| Inlet                     | Bottom Chamber |               |              |                  | Lid Chamber   |                  | Outlet      |                  |
| 120                       | 210            |               |              |                  | 210           |                  | 120         |                  |

**Table S14.** TiCl<sub>4</sub>/H<sub>2</sub>O (2 cycles)-TiCl<sub>4</sub>/HQ (8 cycles). Global cycles 120. Deposition temperature: 210 °C. Annealing conditions: RT to 250 °C (1 min), 250 °C to 450 °C (90 min), 5 h at 450 °C.

| Layer 1: TiO <sub>2</sub> |               |               |              |                  |               |                  |        |               |
|---------------------------|---------------|---------------|--------------|------------------|---------------|------------------|--------|---------------|
| TiCl <sub>4</sub>         |               |               |              | H <sub>2</sub> O |               |                  |        |               |
| N <sub>2</sub> (sccm)     | Pulse (ms)    | Residence (s) | Purge (s)    | Pulse (ms)       | Residence (s) | Purge (s)        | Cycles |               |
| 65                        | 200           | 0             | 60           | 200              | 0             | 65               | 2      |               |
|                           |               |               |              |                  |               |                  |        |               |
| Layer 2: Ti-HQ            |               |               |              |                  |               |                  |        |               |
| TiCl <sub>4</sub>         |               |               | Hydroquinone |                  |               |                  |        |               |
| Pulse (ms)                | Residence (s) | Purge (s)     | Pulse (ms)   | Residence (s)    | Purge (s)     | Temperature (°C) | Cycles | Cycles Global |

|                  |                |    |    |             |    |        |   |     |
|------------------|----------------|----|----|-------------|----|--------|---|-----|
| 200              | 0              | 60 | 12 | 0           | 70 | 120    | 8 | 120 |
| Temperature (°C) |                |    |    |             |    |        |   |     |
| Inlet            | Bottom Chamber |    |    | Lid Chamber |    | Outlet |   |     |
| 120              | 210            |    |    | 210         |    | 120    |   |     |

## 2. Online monitoring of the photocatalytic degradation of NO(g).

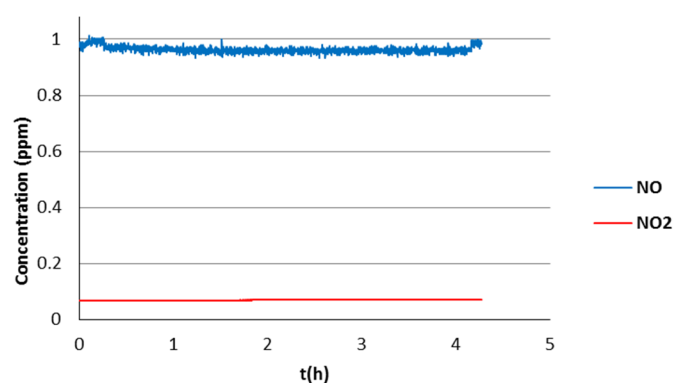

**Figure S1.** Monitoring of the photocatalytic degradation of NO(g) by a coated-glass fabricated from a MLD titanicone thin film (TiCl<sub>4</sub>/EG) with deposition and annealing conditions according to Table S1.

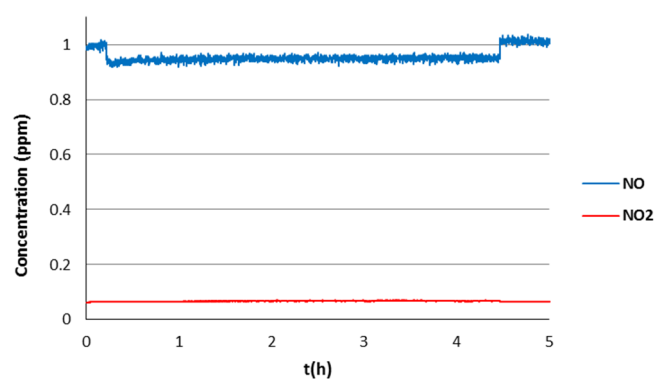

**Figure S2.** Monitoring of the photocatalytic degradation of NO(g) by a coated-glass fabricated from a MLD titanicone thin film (TiCl<sub>4</sub>/EG) with deposition and annealing conditions according to Table S2.

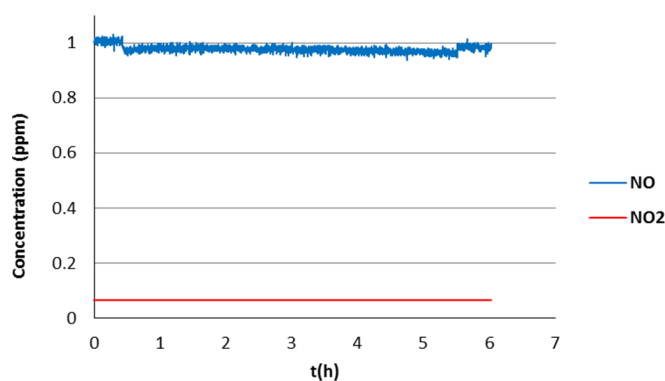

**Figure S3.** Monitoring of the photocatalytic degradation of NO(g) by a coated-glass fabricated from a MLD titanicone thin film (TiCl<sub>4</sub>/EG) with deposition and annealing conditions according to Table S3.

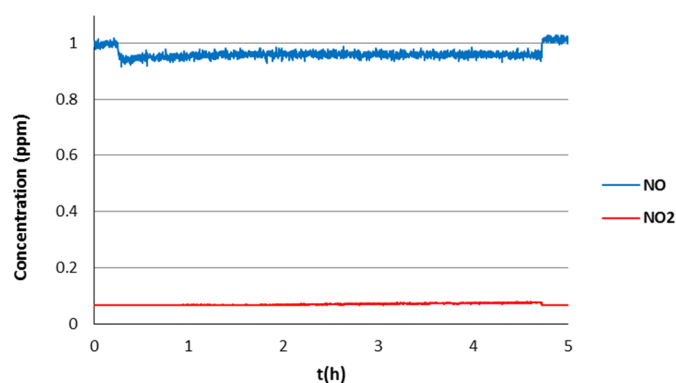

**Figure S4.** Monitoring of the photocatalytic degradation of NO(g) by a coated-glass fabricated from a MLD titaniconcine thin film (TiCl<sub>4</sub>/EG) with deposition and annealing conditions according to Table S4.

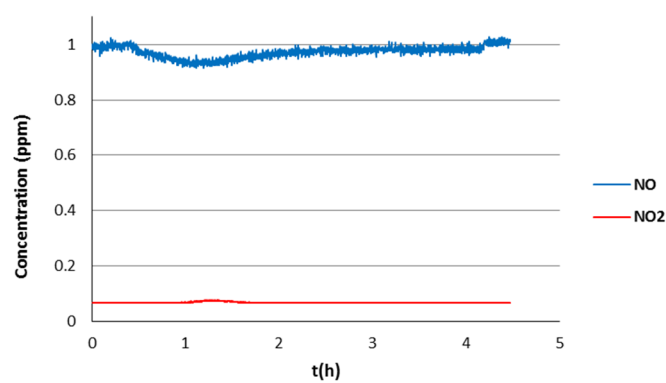

**Figure S5.** Monitoring of the photocatalytic degradation of NO(g) by a coated-glass fabricated from a MLD titaniconcine thin film (TiCl<sub>4</sub>/EG) with deposition and annealing conditions according to Table S5.

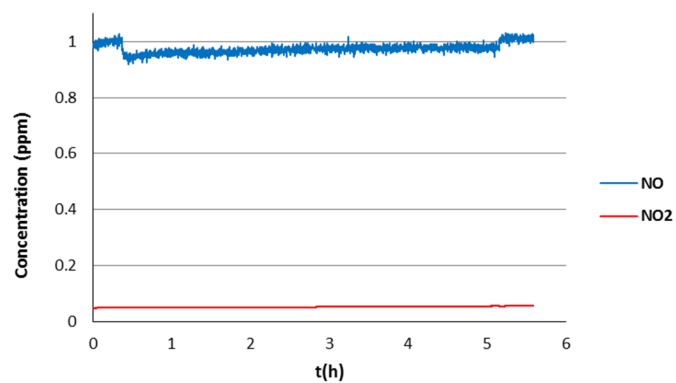

**Figure S6.** Monitoring of the photocatalytic degradation of NO(g) by a coated-glass fabricated from a MLD titaniconcine thin film (TiCl<sub>4</sub>/EG) with deposition and annealing conditions according to Table S6.

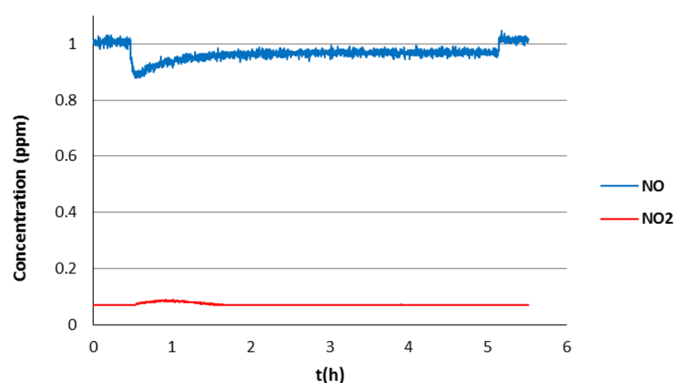

**Figure S7.** Monitoring of the photocatalytic degradation of NO(g) by a coated-glass fabricated from a MLD titanicon thin film (TiCl<sub>4</sub>/EG) with deposition and annealing conditions according to Table S7.

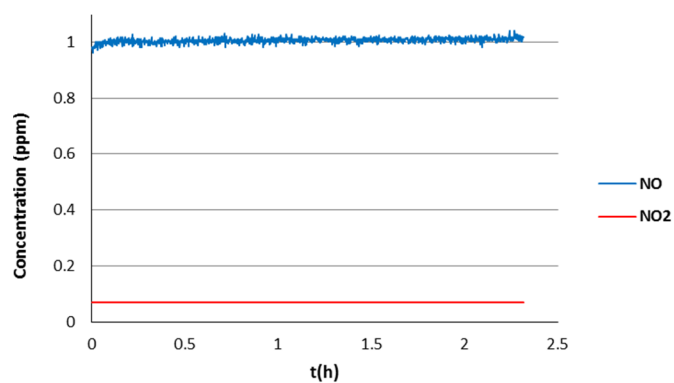

**Figure S8.** Monitoring of the photocatalytic degradation of NO(g) by a coated-glass fabricated from a MLD titanicon thin film (TiCl<sub>4</sub>/EG) with deposition and annealing conditions according to Table S8.

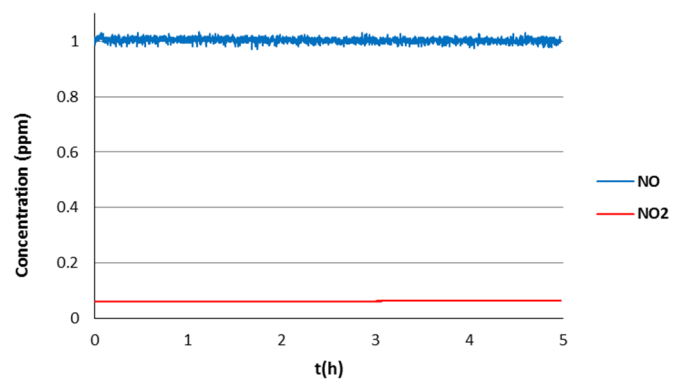

**Figure S9.** Monitoring of the photocatalytic degradation of NO(g) by a coated-glass fabricated from a ALD TiO<sub>2</sub> thin film (TiCl<sub>4</sub>/H<sub>2</sub>O) with deposition and annealing conditions according to Table S9.

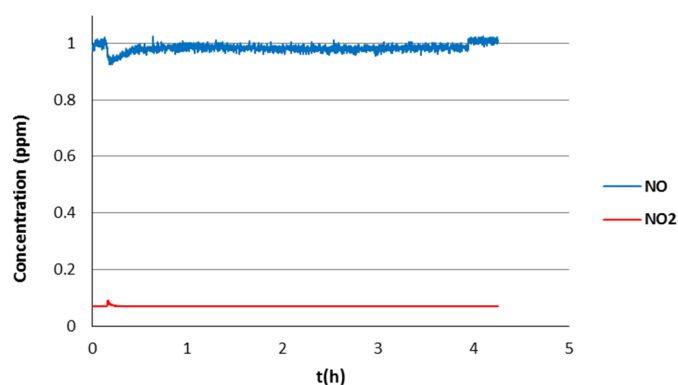

**Figure S10.** Monitoring of the photocatalytic degradation of NO(g) by a coated-glass fabricated from a titanicon thin film using a combined ALD/MLD deposition strategy (TiCl<sub>4</sub>/H<sub>2</sub>O/HQ) with deposition and annealing conditions according to Table S10.

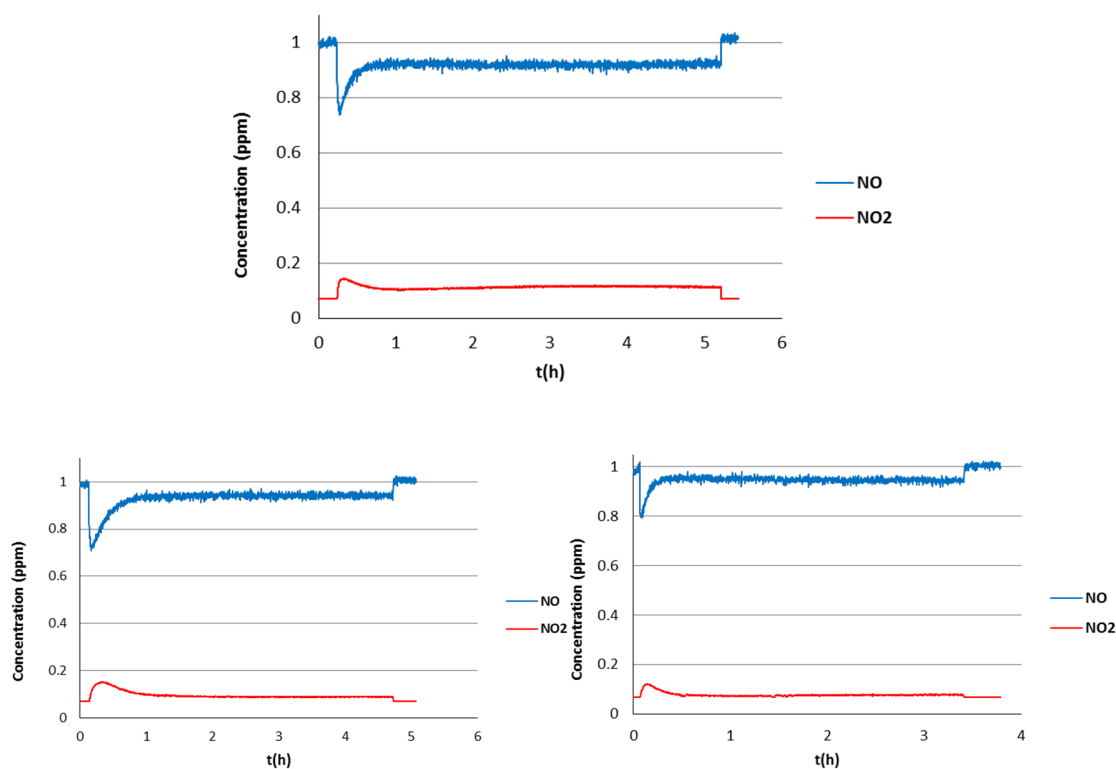

**Figure S11.** Monitoring of the photocatalytic degradation of NO(g) by a coated-glass fabricated from a titanicon thin film using a combined ALD/MLD deposition strategy (TiCl<sub>4</sub>/H<sub>2</sub>O/HQ) with deposition and annealing conditions according to Table S11: first photocatalytic cycle (top), second photocatalytic cycle (bottom left), third photocatalytic cycle (bottom right).

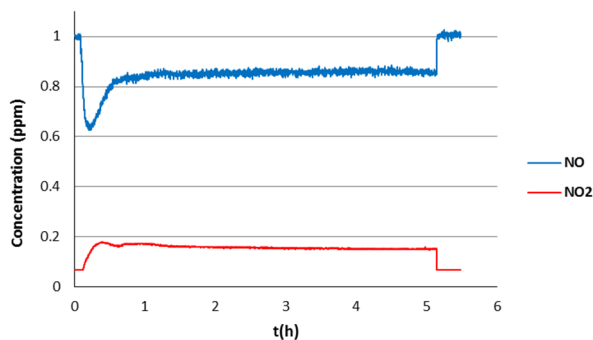

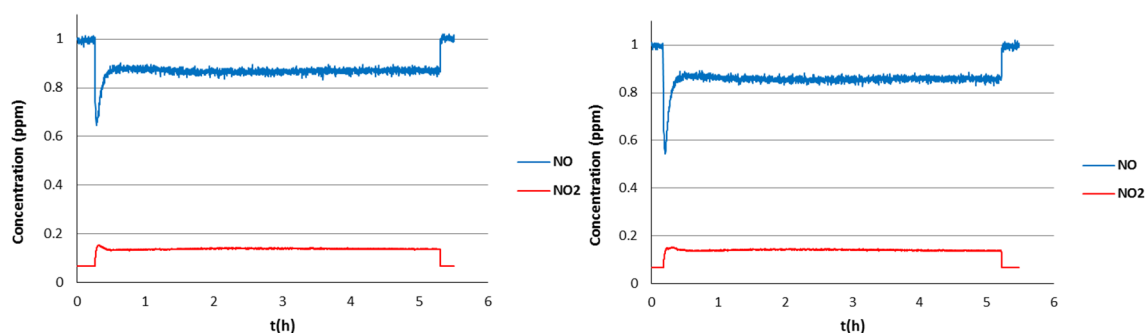

**Figure S12.** Monitoring of the photocatalytic degradation of NO(g) by a coated-glass fabricated from a titaniconc thin film using a combined ALD/MLD deposition strategy (TiCl<sub>4</sub>/H<sub>2</sub>O/HQ) with deposition and annealing conditions according to Table S12: first photocatalytic cycle (top), second photocatalytic cycle (bottom left), third photocatalytic cycle (bottom right).

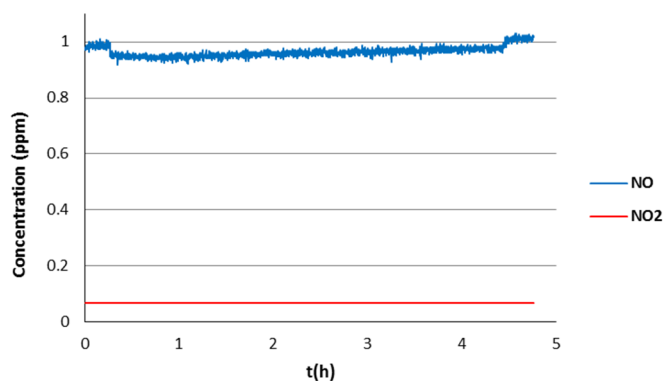

**Figure S13.** Monitoring of the photocatalytic degradation of NO(g) by a coated-glass fabricated from a titaniconc thin film using a combined ALD/MLD deposition strategy (TiCl<sub>4</sub>/H<sub>2</sub>O/HQ) with deposition and annealing conditions according to Table S13.

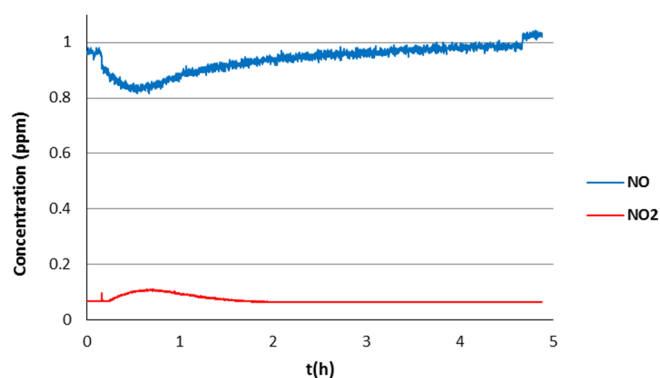

**Figure S14.** Monitoring of the photocatalytic degradation of NO(g) by a coated-glass fabricated from a titaniconc thin film using a combined ALD/MLD deposition strategy (TiCl<sub>4</sub>/H<sub>2</sub>O/HQ) with deposition and annealing conditions according to Table S14.

### 3. Experimental setup for the measurement of the photocatalytic activity.

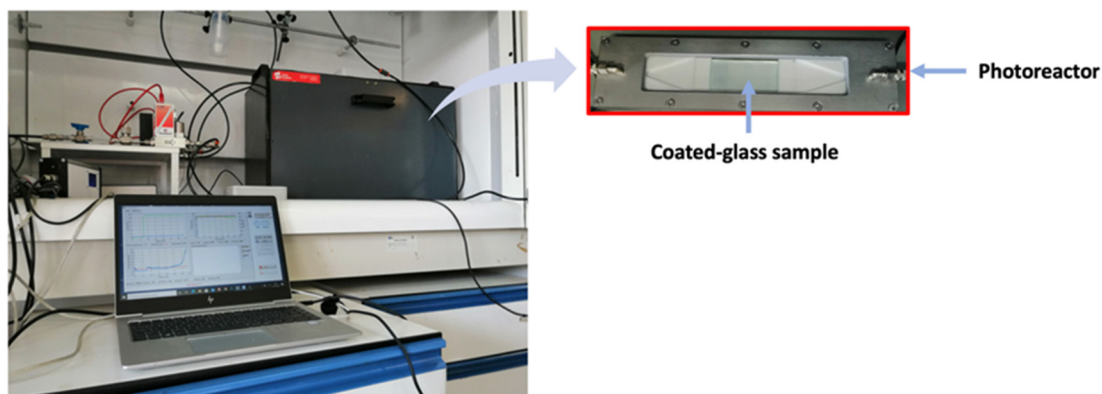

**Figure S15.** Photograph of the experimental setup including a detailed image of the photoreactor.

### 4. Raman, XRD and UV-Vis spectra for selected photocatalytic coatings.

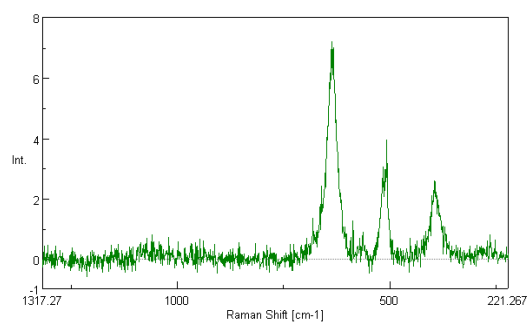

**Figure S16.** Raman spectra of a coated-glass fabricated from an MLD thin film ( $\text{TiCl}_4/\text{EG}$ ) with deposition and annealing conditions according to Table S2. Absorption bands: 639, 513, 399  $\text{cm}^{-1}$ .

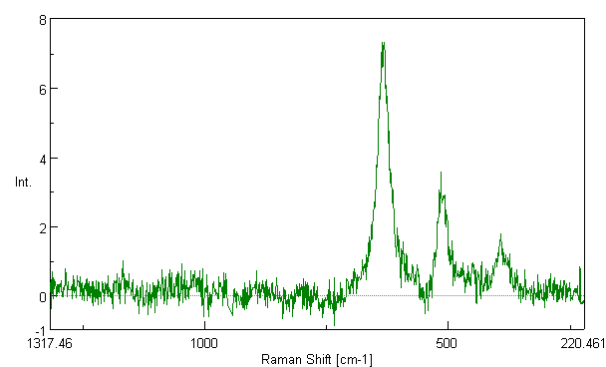

**Figure S17.** Raman spectra of a coated-glass fabricated from an ALD thin film ( $\text{TiCl}_4/\text{H}_2\text{O}$ ) with deposition and annealing conditions according to Table S9. Absorption bands: 639, 513, 399  $\text{cm}^{-1}$ .

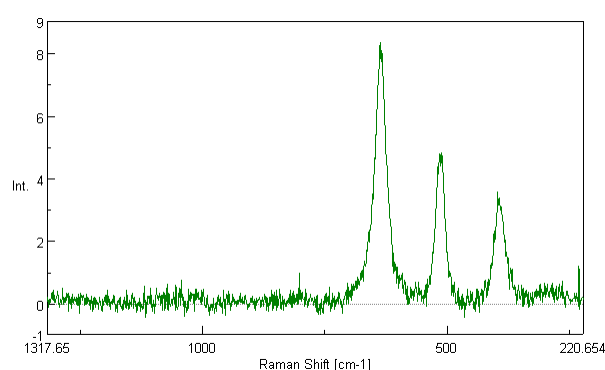

**Figure S18.** Raman spectra of a coated-glass fabricated from an ALD/MLD thin film ( $\text{TiCl}_4/\text{H}_2\text{O}/\text{HQ}$ ) with deposition and annealing conditions according to Table S11. Absorption bands: 639, 513, 399  $\text{cm}^{-1}$ .

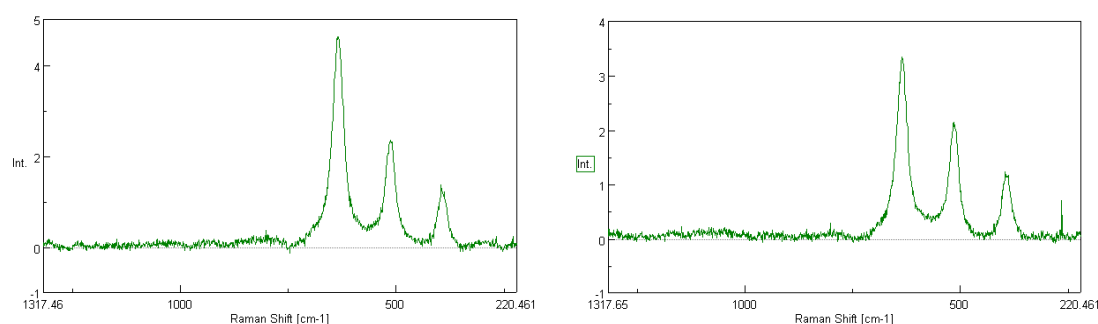

**Figure S19.** Raman spectra of a coated-glass fabricated from an ALD/MLD thin film ( $\text{TiCl}_4/\text{H}_2\text{O}/\text{HQ}$ ) with deposition and annealing conditions according to TS12: no iridescent zone (left) and iridescent zone (right). Absorption bands: 639, 513, 399  $\text{cm}^{-1}$ .

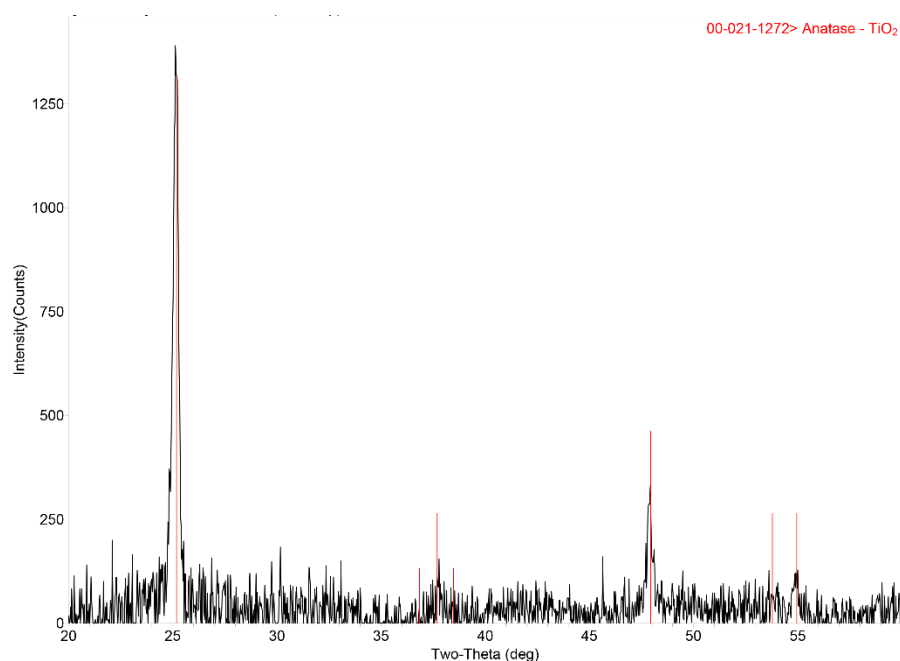

**Figure S20.** XRD pattern of a coated-glass fabricated from an inorganic-organic thin film using a combined ALD/MLD deposition strategy ( $\text{TiCl}_4/\text{H}_2\text{O}/\text{HQ}$ ) with deposition and annealing conditions

according to Table S12:  $2\theta$  25.2°, 36.8°, 37.7°, 38.5°, 48.0°, 53.8° and 55.0°. The anatase pattern obtained from the JCPDS-International Centre for Diffraction Data-2000 database is shown in red.

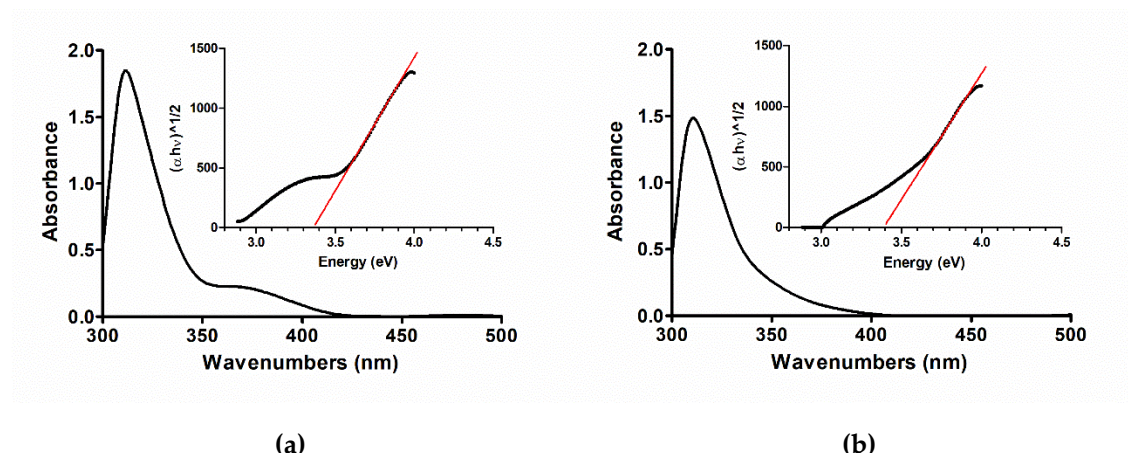

**Figure S21.** UV-Vis spectra of coated-glasses fabricated from an inorganic-organic thin film using a combined ALD/MLD deposition strategy ( $\text{TiCl}_4/\text{H}_2\text{O}/\text{HQ}$ ) with deposition and annealing conditions according to: a) Table S12, and b) Table S14. Insets show bandgap determination using a Tauc method.

## 5. SEM/TEM images for selected photocatalytic coatings.

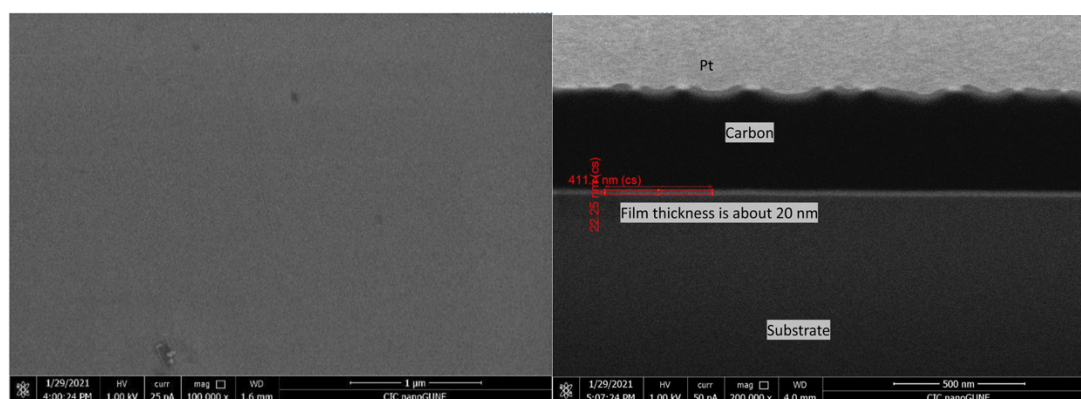

**Figure S22.** Surface (left) and cross-sectional (right) SEM images of a coated-glass fabricated from an MLD titanocene thin film ( $\text{TiCl}_4/\text{EG}$ ) with deposition and annealing conditions according to Table S1.

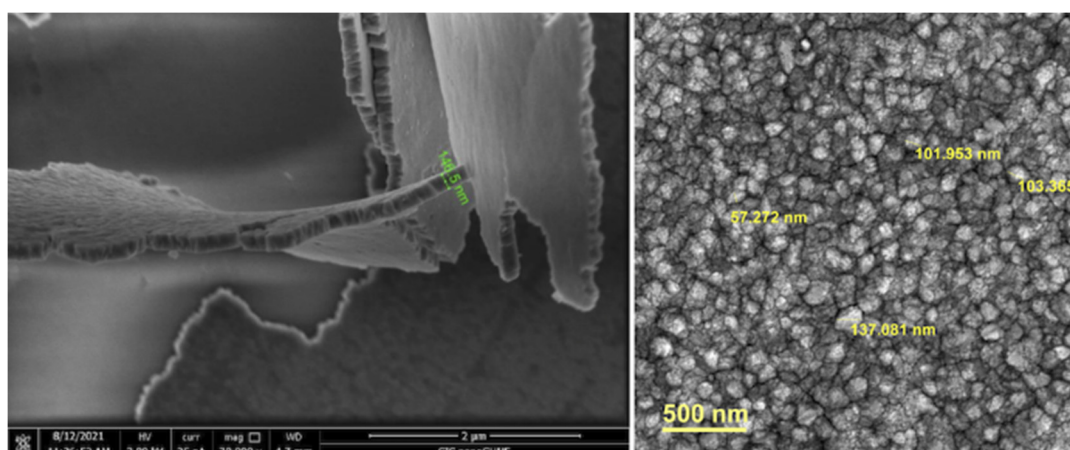

**Figure S23.** SEM image of the film detached from the substrate (scratch) showing a columnar structure (left) and HR SEM image of the surface (right) of a coated-glass fabricated from an inorganic-organic thin film using a combined ALD/MLD deposition strategy ( $\text{TiCl}_4/\text{H}_2\text{O}/\text{HQ}$ ) with deposition and annealing conditions according to Table S12.

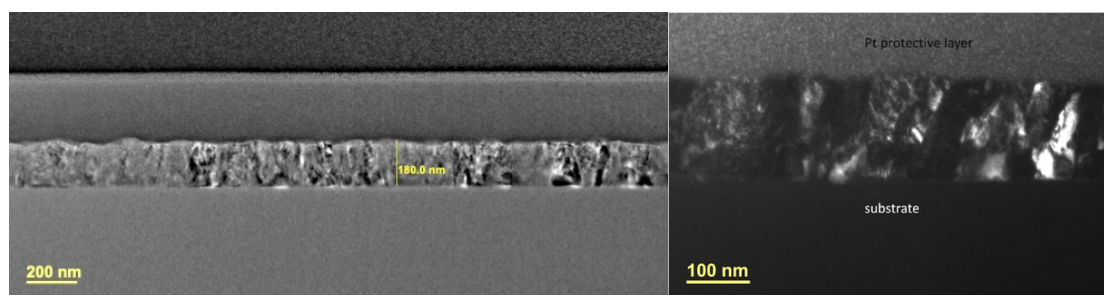

**Figure S24.** Low magnification TEM image (left) showing a film thickness of about 180 nm of the above sample and dark-field TEM image showing the crystalline grains in the film (right).

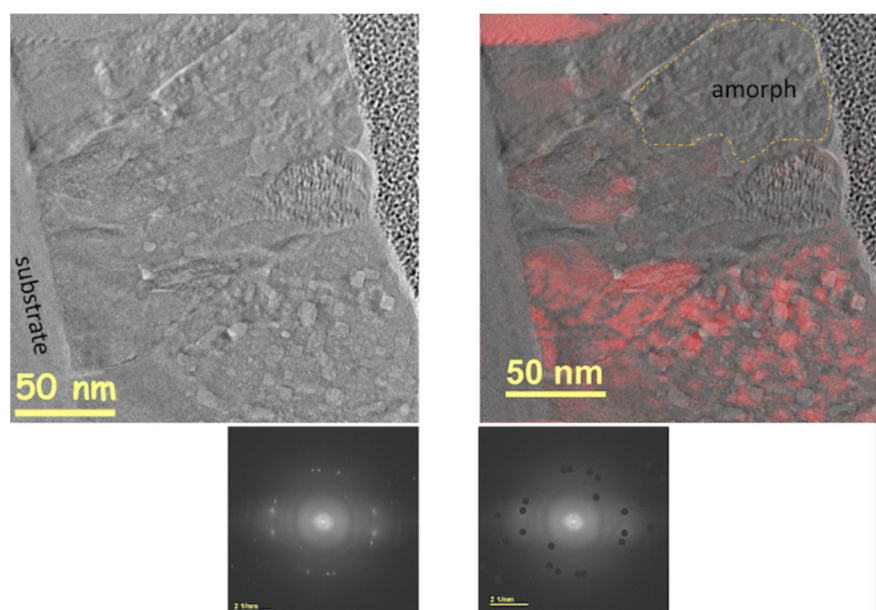

**Figure S25.** HRTEM image showing nanocrystals of different size and amorphous (or less ordered) phase (left) of the above sample and virtual dark field image showing the crystalline part (reflections marked on FFT).

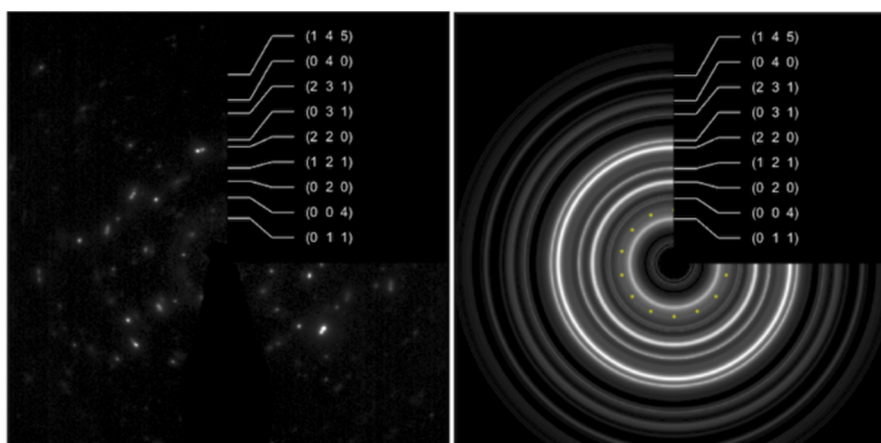

**Figure S26.** Electron diffraction pattern of a selected nanocrystal of the above sample showing the presence of TiO<sub>2</sub> (anatase).

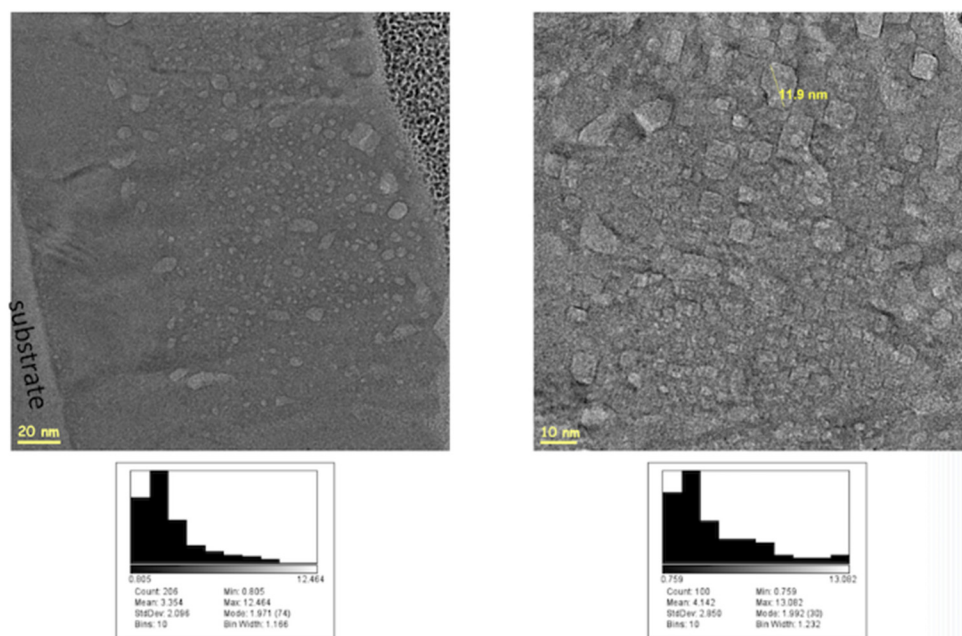

**Figure S27.** HRTEM image of the above sample showing the measured pore size: average 3–4 nm, min: 0.8 nm, max: 13 nm.

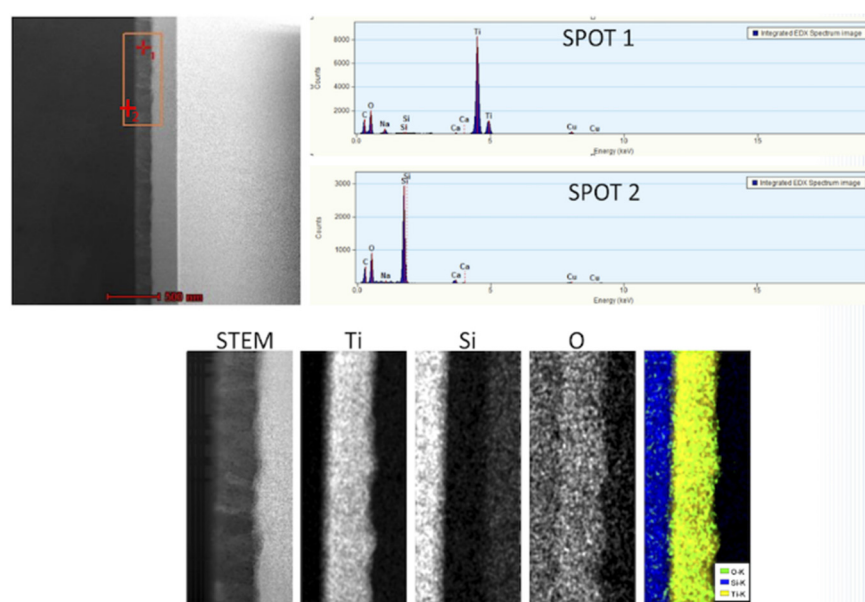

**Figure S28.** Composition analysis by STEM-EDX of the above sample at selected points on the substrate and coating, including EDX mapping.
